# Supplementary material
Source: publisher site journal article supplement (https://www.dovepress.com/article/468420)
Supplement: Supplementary file 1 [file get_supplementary_file.php]

| **Supplementary File** The Association of Obstructive Sleep Apnea and Nonalcoholic Fatty Liver Disease: Evidence, Mechanism, and Treatment Lingling Wang1, Huiguo Liu1, Ling Zhou1, Pengdou Zheng1, Hai Li2, Huojun Zhang3*, and Wei Liu2*  1Department of Respiratory and Critical Care Medicine, Key Laboratory of Pulmonary Diseases of Health Ministry, Tongji Hospital, Tongji Medical College, Huazhong University of Science and Technology, Wuhan 430030, China; 2 Department of Geriatrics, Key Laboratory of Vascular Aging, Ministry of Education, Tongji Hospital, Tongji Medical College, Huazhong University of Science and Technology, Wuhan 430030, China; 3Department of Respiratory and Critical Care Medicine, Renmin Hospital of Wuhan University, Wuhan 430060, China.  *These authors contributed equally to this work  Correspondence: Huojun Zhang, Email (hjzhang@whu.edu.cn); Wei Liu, Email (404793938@tjh.tjmu.edu.cn)  **Table S1**. Studies on the effects of CPAP on the characteristics of NAFLD | | | | | | |
| --- | --- | --- | --- | --- | --- | --- |
| References | No. of participants | Duration | AHI  (events/hour) | Outcomes | Key findings about the liver |
| 1 | 70  (50/20) | 6 months | >15 | Beneficial | Both the AST and ALT levels were reduced after 6 months of CPAP treatment in those patients without changes in BMI and in those patients with a high compliance. | | |
| 2 | 32  (9/23) | 89 ± 62 days | >2  (Children) | Beneficial | CPAP can reverse the parameters of liver injury and reduce oxidative stress in NAFLD children with OSA, including alanine aminotransferase, metabolic syndrome markers, and F (2)-isoprostanes. | | |
| 3 | 35 | At least 2 months | 5 | Beneficial | There was a statistically significant improvement in AST, ALT, and platelet ratio index with CPAP therapy, and the longer the treatment, the better. | | |
| 4 | 160  (130/30) | 3 months | >15 | Beneficial | The OSA severity was independently associated with liver steatosis and AST/ALT, and the AST/ALT level was decreased after 3 months of CPAP treatment. | | |
| 5 | 1  (Case report) | 6 years | 50 | Beneficial | The liver enzyme levels decreased after 1 year of CPAP therapy and normalized after 6 years, with no change in abdominal circumference and BMI. | | |
| 6 | 61 | 2-3years | ＞20  (obese) | Beneficial | Insulin resistance and liver fat are decreased after CPAP therapy in OSA patients with fatty liver, despite having a stable BMI. | | |
| 7 | 5,214  (2607/2607) | 2 to 6 years |  | Beneficial | The cohort study showed that the cumulative incidence rate of developing liver disease was lower in the CPAP group than in the non-CPAP group. | | |
| 8 | 10  (6/4) | 2–3 years | ≥ 5 | Beneficial | The mean liver attenuation index and aspartate aminotransferase levels improved significantly with CPAP therapy adherence after 2–3 years. | | |
| 9 | 40 | 6 months | >20  (Obese) | Beneficial | The mean (+/-SD) aspartate aminotransferase levels were higher than those before treatment and increased less after only one night of treatment. Similar improvements were seen after 1 and 6 months of CPAP therapy. | | |
| 10 | 120  (60/60) | 6 months | >5 | No effect | CPAP alone is unlikely to improve the features of NAFLD among OSA patients in the therapeutic group than in the subtherapeutic group. | | |
| 11 | 120 | 6 months | >5 | No effect | Although hepatic steatosis was associated with the markers of OSA severity, 6 months of CPAP treatment did not improve hepatic steatosis and fibrosis. | | |
| 12 | 84  (42/42) | 6–12 weeks | >15 | No effect | Hepatic steatosis, NASH, or fibrosis are increased in untreated OSA cases after adjusting for sex, BMI, baseline apnea + hypopnea index, and severity of liver injury, but no improvement was seen after the CPAP treatment. | | |
| 13 | 15 | 6–12 months | 52.5 ± 19.1 | No effect | There was no significant change in AST/ALT levels during follow-up. | | |
| 14 | 81  (42/39) | 2 months | >10 (females);  >15  (males) | No effect | Two months of CPAP treatment did not affect the general, abdominal, or intrahepatic adiposity. | | |
| 15 | 38 | 2 months | ≥ 25h | No effect | The alkaline phosphatase levels decreased with therapeutic CPAP as compared with sham CPAP but the other liver enzyme levels remained unchanged. | | |
| 16 | 65  (34/31) | 12 weeks | >15 | No effect | Liver fat and visceral adiposity were not reduced with CPAP alone. | | |
| 17 | 30 | 10.27 ± 5.07 months | 55.9 ± 26.1 | No effect | There were no statistically significant differences in the AST levels from baseline and at 6 months of CPAP treatment. | | |
| 18 | 94 | 4 weeks | >15 | No effect | Active CPAP use for 4 weeks has no beneficial effect on the aminotransferase levels. | | |

CPAP, continuous positive airway pressure; OSA, obstructive sleep apnea; NAFLD, nonalcoholic fatty liver disease; AHI, apnea hypopnea index; AST, aspartate aminotransferase; ALT, alanine transaminase; LOX, lysol oxidase; BMI, body mass index.

# References

1. Hirono H, Watanabe K, Hasegawa K, Kohno M, Terai S, Ohkoshi S. Impact of continuous positive airway pressure therapy for nonalcoholic fatty liver disease in patients with obstructive sleep apnea. *World J Clin Cases*. 2021;9(19):5112-5125. doi:10.12998/wjcc.v9.i19.5112

2. Sundaram SS, Halbower AC, Klawitter J, et al. Treating Obstructive Sleep Apnea and Chronic Intermittent Hypoxia Improves the Severity of Nonalcoholic Fatty Liver Disease in Children. *J Pediatr*. Jul 2018;198:67-75 e1. doi:10.1016/j.jpeds.2018.03.028

3. Kim D, Ahmed A, Kushida C. Continuous Positive Airway Pressure Therapy on Nonalcoholic Fatty Liver Disease in Patients With Obstructive Sleep Apnea. *J Clin Sleep Med*. 2018;14(8):1315-1322. doi:10.5664/jcsm.7262

4. Chen L-D, Zhang L-J, Lin X-J, et al. Association between continuous positive airway pressure and serum aminotransferases in patients with obstructive sleep apnea. *Eur Arch Otorhinolaryngol*. 2018;275(2):587-594. doi:10.1007/s00405-017-4840-0

5. Bajantri B, Lvovsky D. A Case of Concomitant Obstructive Sleep Apnea and Non-Alcoholic Steatohepatitis Treated With CPAP Therapy. *Gastroenterology Res*. Jun 2018;11(3):252-259. doi:10.14740/gr1033w

6. Toyama Y, Murase K, Azuma M, et al. Impact of long-term continuous positive airway pressure on liver fat in male obstructive sleep apnea patients with fatty liver. *Sleep and Biological Rhythms*. 2017;16(1):117-124. doi:10.1007/s41105-017-0133-7

7. Hang L-W, Chen C-F, Wang C-B, Wu T-N, Liang W-M, Chou T-C. The association between continuous positive airway pressure therapy and liver disease development in obstructive sleep apnea/hypopnea syndrome patients: a nationwide population-based cohort study in Taiwan. *Sleep & breathing = Schlaf & Atmung*. 2017;21(2):461-467. doi:10.1007/s11325-016-1439-4

8. Shpirer I, Copel L, Broide E, Elizur A. Continuous positive airway pressure improves sleep apnea associated fatty liver. *Lung*. Aug 2010;188(4):301-7. doi:10.1007/s00408-009-9219-6

9. Chin K, Nakamura T, Takahashi K, et al. Effects of obstructive sleep apnea syndrome on serum aminotransferase levels in obese patients. *Am J Med*. Apr 1 2003;114(5):370-6. doi:10.1016/s0002-9343(02)01570-x

10. Hui DSC, Ng SSS, Wong GLH, Chu WCW, Chan A, Wong VWS. Obstructive sleep apnoea and continuous positive airway pressure therapy for patients with non-alcoholic fatty liver disease: abridged secondary publication. *Hong Kong Med J*. Feb 2022;28 Suppl 1(1):42-45.

11. Ng SSS, Wong VWS, Wong GLH, et al. Continuous Positive Airway Pressure Does Not Improve Nonalcoholic Fatty Liver Disease in Patients with Obstructive Sleep Apnea. A Randomized Clinical Trial. *Am J Respir Crit Care Med*. Feb 15 2021;203(4):493-501. doi:10.1164/rccm.202005-1868OC

12. Jullian-Desayes I, Tamisier R, Zarski J-P, et al. Impact of effective versus sham continuous positive airway pressure on liver injury in obstructive sleep apnoea: Data from randomized trials. *Respirology (Carlton, Vic)*. 2016;21(2):378-385. doi:10.1111/resp.12672

13. Buttacavoli M, Gruttad'Auria CI, Olivo M, et al. Liver Steatosis and Fibrosis in OSA patients After Long-term CPAP Treatment: A Preliminary Ultrasound Study. *Ultrasound Med Biol*. 2016;42(1):104-109. doi:10.1016/j.ultrasmedbio.2015.08.009

14. Kritikou I, Basta M, Tappouni R, et al. Sleep apnoea and visceral adiposity in middle-aged male and female subjects. *Eur Respir J*. Mar 2013;41(3):601-9. doi:10.1183/09031936.00183411

15. Sivam S, Phillips CL, Trenell MI, et al. Effects of 8 weeks of continuous positive airway pressure on abdominal adiposity in obstructive sleep apnoea. *Eur Respir J*. Oct 2012;40(4):913-8. doi:10.1183/09031936.00177011

16. Hoyos CM, Killick R, Yee BJ, Phillips CL, Grunstein RR, Liu PY. Cardiometabolic changes after continuous positive airway pressure for obstructive sleep apnoea: a randomised sham-controlled study. *Thorax*. Dec 2012;67(12):1081-9. doi:10.1136/thoraxjnl-2011-201420

17. Cifci N, Uyar M, Elbek O, Suyur H, Ekinci E. Impact of CPAP treatment on cardiac biomarkers and pro-BNP in obstructive sleep apnea syndrome. *Sleep Breath*. Sep 2010;14(3):241-4. doi:10.1007/s11325-009-0306-y

18. Kohler M, Pepperell JC, Davies RJ, Stradling JR. Continuous positive airway pressure and liver enzymes in obstructive sleep apnoea: data from a randomized controlled trial. *Respiration*. 2009;78(2):141-6. doi:10.1159/000170785
